# Supplementary material for: Polycomb group proteins Ring1A/B are functionally linked to the core transcriptional regulatory circuitry to maintain ES cell identity
Source: Oxford University Press journal article supplement (doi:10.1242/dev.014340), 2008-03-14
Supplement: dev014340-tables1.pdf [file dev014340-tables1.pdf]

**Table S1. Gene ontology analysis of derepressed genes by *Ring1B*-KO or *Ring1A/B*-dKO in ES cells****Derepressed genes by *Ring1A/B*-dKO (4 days after OHT treatment)**

| Category                      | GO description                                                                    | P value |
|-------------------------------|-----------------------------------------------------------------------------------|---------|
| Biological process            | Development                                                                       | 2.3E-29 |
|                               | Regulation of transcription                                                       | 8.0E-17 |
|                               | Pattern specification                                                             | 1.1E-14 |
|                               | Cell adhesion                                                                     | 1.2E-14 |
|                               | Signal transduction                                                               | 1.1E-13 |
|                               | Organ morphogenesis                                                               | 1.0E-11 |
|                               | G-protein coupled receptor protein signaling pathway                              | 1.9E-11 |
|                               | Immune response                                                                   | 4.3E-10 |
|                               | Antigen processing and presentation of endogenous antigen                         | 3.2E-09 |
|                               | Antigen processing and presentation of endogenous peptide antigen via MHC class I | 8.6E-09 |
|                               | Ion transport                                                                     | 1.3E-08 |
|                               | Transmembrane receptor protein tyrosine kinase signaling pathway                  | 1.7E-08 |
|                               | Phosphate transport                                                               | 7.9E-08 |
|                               | Axon guidance                                                                     | 8.5E-08 |
|                               | Cell fate commitment                                                              | 3.3E-07 |
| Molecular function            | Sequence-specific DNA binding                                                     | 1.2E-23 |
|                               | Receptor activity                                                                 | 2.2E-23 |
|                               | Transcription factor activity                                                     | 4.2E-23 |
|                               | Ion channel activity                                                              | 4.3E-13 |
|                               | Calcium ion binding                                                               | 1.8E-12 |
|                               | Signal transducer activity                                                        | 5.3E-12 |
|                               | Voltage-gated ion channel activity                                                | 2.3E-10 |
|                               | G-protein coupled receptor activity                                               | 2.1E-09 |
|                               | GPI anchor binding                                                                | 2.8E-09 |
|                               | Structural molecule activity                                                      | 3.2E-09 |
|                               | Rhodopsin-like receptor activity                                                  | 1.0E-08 |
|                               | Extracellular matrix structural constituent conferring tensile strength           | 4.8E-08 |
| MHC class I receptor activity | 6.2E-08                                                                           |         |
| Cellular component            | Extracellular space                                                               | 9.0E-58 |
|                               | Membrane                                                                          | 1.6E-31 |
|                               | Integral to membrane                                                              | 4.3E-30 |
|                               | Extracellular matrix (sensu Metazoa)                                              | 5.5E-24 |
|                               | Extracellular region                                                              | 5.1E-23 |
|                               | Transcription factor complex                                                      | 2.3E-19 |
|                               | Integral to plasma membrane                                                       | 9.3E-14 |
|                               | Collagen                                                                          | 6.3E-09 |
|                               | External side of plasma membrane                                                  | 3.2E-08 |
|                               | Plasma membrane                                                                   | 6.2E-08 |
| MHC class I protein complex   | 4.2E-07                                                                           |         |

**Derepressed genes by *Ring1B*-KO (4 days after OHT treatment)**

| Category                            | GO description                   | P value           |
|-------------------------------------|----------------------------------|-------------------|
| Biological process                  | Development                      | 6.7E-14           |
|                                     | Pattern specification            | 4.4E-12           |
|                                     | Immune response                  | 3.0E-11           |
|                                     | Organ morphogenesis              | 1.6E-10           |
|                                     | Ion transport                    | 8.8E-10           |
|                                     | Signal transduction              | 1.8E-08           |
|                                     | Defense response                 | 2.9E-08           |
|                                     | Regulation of transcription      | 2.7E-07           |
|                                     | Cell adhesion                    | 3.6E-07           |
|                                     | Molecular function               | Receptor activity |
| Sequence-specific DNA binding       |                                  | 5.9E-12           |
| Ion channel activity                |                                  | 1.1E-11           |
| Calcium ion binding                 |                                  | 9.2E-11           |
| G-protein coupled receptor activity |                                  | 1.8E-10           |
| Signal transducer activity          |                                  | 1.4E-09           |
| Transcription factor activity       |                                  | 2.8E-09           |
| Sugar binding                       | 3.4E-07                          |                   |
| Cellular component                  | Extracellular space              | 7.4E-18           |
|                                     | Extracellular region             | 9.6E-18           |
|                                     | Membrane                         | 3.7E-16           |
|                                     | Integral to membrane             | 4.9E-16           |
|                                     | Integral to plasma membrane      | 2.0E-14           |
|                                     | External side of plasma membrane | 3.4E-07           |
