# Supplementary material for: Polycomb group proteins Ring1A/B are functionally linked to the core transcriptional regulatory circuitry to maintain ES cell identity
Source: Oxford University Press journal article supplement (doi:10.1242/dev.014340), 2008-03-14
Supplement: dev014340-tables2.pdf [file dev014340-tables2.pdf]

**Table S2. Comparison of expression array data for *Ring1B* -KO and *Ring1A/B*-dKO ES cells****A. Average fold expression changes in *Ring1B*-KO and *Ring1A/B*-dKO (ratio of KO/control)**

|                              | Total  | GO:development ( <i>P</i> value) |
|------------------------------|--------|----------------------------------|
| <i>Ring1B</i> -KO (day 4)    | 1.011  | 1.046 ( $2.8 \times 10^{-3}$ )   |
| <i>Ring1A/B</i> -dKO (day 4) | 1.031  | 1.389 ( $2.4 \times 10^{-18}$ )  |
| No. of probes                | 45,037 | 1006                             |

**B. Average ratios of *Ring1A/B*-dKO (day 4) to *Ring1B*-KO (day 4) for each probe**

|                | No. of probes | dKO/KO | <i>P</i> value       |
|----------------|---------------|--------|----------------------|
| Total          | 27,280        | 0.986  | $1.9 \times 10^{-3}$ |
| GO:development | 668           | 1.206  | $7.2 \times 10^{-9}$ |
