# Supplementary material for: Polycomb group proteins Ring1A/B are functionally linked to the core transcriptional regulatory circuitry to maintain ES cell identity
Source: Oxford University Press journal article supplement (doi:10.1242/dev.014340), 2008-03-14
Supplement: dev014340-tables3.pdf [file dev014340-tables3.pdf]

**Table S3. Raw data for Fig. 2B****Comparison of target binding of Ring1B in ES cells and expression changes in *Ring1B* constitutive KO ES cells**

| Fold enrichment | No. of genes | No. of expressed genes | No. of derepressed genes | No. of repressed genes | Mean of expression changes (KO/cont) | Mean of expression changes (log <sub>10</sub> ) | SD    | P value  |
|-----------------|--------------|------------------------|--------------------------|------------------------|--------------------------------------|-------------------------------------------------|-------|----------|
| 0.0-2.5         | 3872         | 1315                   | 674                      | 641                    | 1.030                                | 0.013                                           | 0.189 | 1.54E-02 |
| 2.5-5.0         | 5103         | 2744                   | 1398                     | 1346                   | 1.029                                | 0.012                                           | 0.187 | 5.90E-04 |
| 5.0-7.5         | 4699         | 2799                   | 1449                     | 1350                   | 1.033                                | 0.014                                           | 0.187 | 8.34E-05 |
| 7.5-10.0        | 2556         | 1515                   | 782                      | 733                    | 1.037                                | 0.016                                           | 0.198 | 1.91E-03 |
| 10.0-12.5       | 1303         | 743                    | 397                      | 346                    | 1.070                                | 0.029                                           | 0.197 | 5.67E-05 |
| 12.5-15.0       | 657          | 368                    | 212                      | 156                    | 1.127                                | 0.052                                           | 0.214 | 4.21E-06 |
| 15.0-17.5       | 357          | 198                    | 118                      | 80                     | 1.183                                | 0.073                                           | 0.260 | 1.14E-04 |
| 17.5-20.0       | 172          | 84                     | 51                       | 33                     | 1.228                                | 0.089                                           | 0.281 | 4.86E-03 |
| 20.0-22.5       | 108          | 51                     | 36                       | 15                     | 1.596                                | 0.203                                           | 0.351 | 1.56E-04 |
| 22.5-25.0       | 39           | 12                     | 9                        | 3                      | 1.250                                | 0.097                                           | 0.199 | 1.34E-01 |
| 25.0+           | 96           | 43                     | 31                       | 12                     | 1.463                                | 0.165                                           | 0.398 | 1.02E-02 |

**Comparison of target binding of Ring1B in ES cells and expression changes in *Ring1AB*-dKO (day 4) ES cells**

| Fold enrichment | No. of genes | No. of expressed genes | No. of derepressed genes | No. of repressed genes | Mean of expression changes (KO/cont) | Mean of expression changes (log <sub>10</sub> ) | SD    | P value  |
|-----------------|--------------|------------------------|--------------------------|------------------------|--------------------------------------|-------------------------------------------------|-------|----------|
| 0.0-2.5         | 3872         | 1292                   | 611                      | 681                    | 1.004                                | 0.002                                           | 0.240 | 7.90E-01 |
| 2.5-5.0         | 5103         | 2693                   | 1306                     | 1387                   | 1.012                                | 0.005                                           | 0.235 | 2.55E-01 |
| 5.0-7.5         | 4699         | 2749                   | 1354                     | 1395                   | 1.040                                | 0.017                                           | 0.250 | 4.18E-04 |
| 7.5-10.0        | 2556         | 1510                   | 771                      | 739                    | 1.097                                | 0.040                                           | 0.276 | 1.68E-08 |
| 10.0-12.5       | 1303         | 753                    | 423                      | 330                    | 1.217                                | 0.085                                           | 0.313 | 2.04E-13 |
| 12.5-15.0       | 657          | 369                    | 204                      | 165                    | 1.240                                | 0.093                                           | 0.334 | 1.49E-07 |
| 15.0-17.5       | 357          | 201                    | 120                      | 81                     | 1.355                                | 0.132                                           | 0.385 | 2.55E-06 |
| 17.5-20.0       | 172          | 86                     | 54                       | 32                     | 1.403                                | 0.147                                           | 0.373 | 4.67E-04 |
| 20.0-22.5       | 108          | 53                     | 29                       | 24                     | 1.662                                | 0.221                                           | 0.491 | 2.07E-03 |
| 22.5-25.0       | 39           | 13                     | 9                        | 4                      | 2.035                                | 0.309                                           | 0.414 | 2.40E-02 |
| 25.0+           | 96           | 41                     | 30                       | 11                     | 2.148                                | 0.332                                           | 0.484 | 9.38E-05 |
