# Supplementary material for: Polycomb group proteins Ring1A/B are functionally linked to the core transcriptional regulatory circuitry to maintain ES cell identity
Source: Oxford University Press journal article supplement (doi:10.1242/dev.014340), 2008-03-14
Supplement: dev014340-tables4.pdf [file dev014340-tables4.pdf]

**Table S4. Raw data for Fig. 3C showing the average expression change by *Ring1A/B* -dKO of derepressed or repressed genes by *Oct3/4*-KO that have more than a certain value of maximum fold enrichment determined by *Ring1B*-ChIP**

| <b>Among total genes</b>                           |                 |                                                             |                    |                                                |
|----------------------------------------------------|-----------------|-------------------------------------------------------------|--------------------|------------------------------------------------|
| Fold enrichment ( <i>Ring1B</i> -ChIP)             | Number of genes | Average fold change by <i>Ring1A/B</i> -dKO ( $\log_{10}$ ) | SD ( $\log_{10}$ ) |                                                |
| 0 (0-1)                                            | 4591            | 0.009                                                       | 0.226              |                                                |
| 1 (1-2)                                            | 4552            | 0.010                                                       | 0.226              |                                                |
| 2 (2-3)                                            | 4280            | 0.011                                                       | 0.227              |                                                |
| 3 (3-4)                                            | 3697            | 0.016                                                       | 0.232              |                                                |
| 4 (4-5)                                            | 2901            | 0.025                                                       | 0.240              |                                                |
| 5 (5-6)                                            | 2191            | 0.031                                                       | 0.242              |                                                |
| 6 (6-7)                                            | 1627            | 0.040                                                       | 0.254              |                                                |
| 7 (7-8)                                            | 1198            | 0.051                                                       | 0.263              |                                                |
| 8 (8-9)                                            | 856             | 0.061                                                       | 0.285              |                                                |
| 9 (9-10)                                           | 650             | 0.070                                                       | 0.296              |                                                |
| 10 (10-11)                                         | 454             | 0.101                                                       | 0.316              |                                                |
| 11 (11-12)                                         | 352             | 0.138                                                       | 0.334              |                                                |
| 12 (12-13)                                         | 294             | 0.149                                                       | 0.354              |                                                |
| 13 (13-14)                                         | 233             | 0.174                                                       | 0.376              |                                                |
| 14 (14-15)                                         | 188             | 0.182                                                       | 0.376              |                                                |
| 15 (15-16)                                         | 148             | 0.215                                                       | 0.384              |                                                |
| 16 (16-17)                                         | 122             | 0.201                                                       | 0.380              |                                                |
| 17 (17-18)                                         | 99              | 0.186                                                       | 0.351              |                                                |
| 18 (18-19)                                         | 82              | 0.218                                                       | 0.360              |                                                |
| 19 (19-20)                                         | 71              | 0.242                                                       | 0.369              |                                                |
| 20 (20-)                                           | 61              | 0.238                                                       | 0.386              |                                                |
| <b>Among derepressed genes by <i>Oct3/4</i>-KO</b> |                 |                                                             |                    |                                                |
| Fold enrichment ( <i>Ring1B</i> -ChIP)             | Number of genes | Average fold change by <i>Ring1A/B</i> -dKO ( $\log_{10}$ ) | SD ( $\log_{10}$ ) | <i>P</i> value of <i>t</i> -test against total |
| 0 (0-1)                                            | 129             | 0.247                                                       | 0.375              | 1.23E-39                                       |
| 1 (1-2)                                            | 128             | 0.251                                                       | 0.375              | 7.87E-40                                       |
| 2 (2-3)                                            | 125             | 0.254                                                       | 0.376              | 6.31E-39                                       |
| 3 (3-4)                                            | 115             | 0.263                                                       | 0.375              | 4.98E-37                                       |
| 4 (4-5)                                            | 92              | 0.283                                                       | 0.391              | 1.15E-28                                       |
| 5 (5-6)                                            | 73              | 0.287                                                       | 0.370              | 1.89E-25                                       |
| 6 (6-7)                                            | 59              | 0.299                                                       | 0.388              | 3.65E-19                                       |
| 7 (7-8)                                            | 46              | 0.332                                                       | 0.412              | 1.27E-14                                       |
| 8 (8-9)                                            | 36              | 0.384                                                       | 0.428              | 1.90E-12                                       |
| 9 (9-10)                                           | 31              | 0.424                                                       | 0.432              | 1.15E-11                                       |
| 10 (10-11)                                         | 24              | 0.485                                                       | 0.453              | 3.49E-09                                       |
| 11 (11-12)                                         | 24              | 0.485                                                       | 0.453              | 2.17E-08                                       |
| 12 (12-13)                                         | 21              | 0.490                                                       | 0.480              | 1.28E-06                                       |
| 13 (13-14)                                         | 18              | 0.581                                                       | 0.457              | 1.77E-07                                       |
| 14 (14-15)                                         | 13              | 0.632                                                       | 0.380              | 4.20E-08                                       |
| 15 (15-16)                                         | 12              | 0.607                                                       | 0.385              | 8.42E-07                                       |
| 16 (16-17)                                         | 10              | 0.556                                                       | 0.335              | 9.11E-07                                       |
| 17 (17-18)                                         | 9               | 0.535                                                       | 0.347              | 1.07E-05                                       |
| 18 (18-19)                                         | 8               | 0.570                                                       | 0.352              | 4.13E-05                                       |
| 19 (19-20)                                         | 8               | 0.570                                                       | 0.352              | 5.93E-05                                       |
| 20 (20+)                                           | 6               | 0.634                                                       | 0.294              | 7.08E-06                                       |

| Among repressed genes by <i>Oct3/4</i> -KO |                 |                                                             |                    |                                        |
|--------------------------------------------|-----------------|-------------------------------------------------------------|--------------------|----------------------------------------|
| Fold enrichment (Ring1B-ChIP)              | Number of genes | Average fold change by <i>Ring1A/B</i> -dKO ( $\log_{10}$ ) | SD ( $\log_{10}$ ) | <i>P</i> value of t-test against total |
| 0 (0-1)                                    | 224             | -0.119                                                      | 0.331              | 7.83E-44                               |
| 1 (1-2)                                    | 221             | -0.115                                                      | 0.330              | 3.17E-42                               |
| 2 (2-3)                                    | 214             | -0.116                                                      | 0.334              | 1.30E-40                               |
| 3 (3-4)                                    | 188             | -0.111                                                      | 0.342              | 1.47E-33                               |
| 4 (4-5)                                    | 155             | -0.081                                                      | 0.344              | 2.30E-21                               |
| 5 (5-6)                                    | 129             | -0.066                                                      | 0.363              | 9.44E-14                               |
| 6 (6-7)                                    | 102             | -0.034                                                      | 0.352              | 3.79E-08                               |
| 7 (7-8)                                    | 82              | -0.024                                                      | 0.374              | 7.59E-06                               |
| 8 (8-9)                                    | 65              | -0.041                                                      | 0.388              | 9.19E-07                               |
| 9 (9-10)                                   | 48              | -0.035                                                      | 0.390              | 1.74E-05                               |
| 10 (10-11)                                 | 33              | 0.047                                                       | 0.383              | 4.74E-02                               |
| 11 (11-12)                                 | 26              | 0.101                                                       | 0.397              | 2.45E-01                               |
| 12 (12-13)                                 | 21              | 0.083                                                       | 0.429              | 1.23E-01                               |
| 13 (13-14)                                 | 15              | 0.113                                                       | 0.466              | 3.03E-01                               |
| 14 (14-15)                                 | 13              | 0.152                                                       | 0.478              | 6.47E-01                               |
| 15 (15-16)                                 | 9               | 0.236                                                       | 0.474              | 7.92E-01                               |
| 16 (16-17)                                 | 8               | 0.214                                                       | 0.498              | 8.88E-01                               |
| 17 (17-18)                                 | 6               | 0.042                                                       | 0.324              | 1.88E-02                               |
| 18 (18-19)                                 | 6               | 0.042                                                       | 0.324              | 7.55E-03                               |
| 19 (19-20)                                 | 4               | 0.128                                                       | 0.244              | 2.03E-02                               |
| 20 (20+)                                   | 3               | 0.060                                                       | 0.247              | 1.69E-02                               |
